# Supplementary material
Source: MDPI journal article supplement (https://www.mdpi.com/2673-8732/4/3/12)
Supplement: s1 [file s1]

## Supplementary Material

| Reference | Architecture | Performance | Computing/Processing | Storage/Buffer | Energy | Mobility | Routing | Contact type | Route determination | No. copies | Design | Applications | Rural comm | Environment | Smart city | Protocol/Soft Implementation |
|-----------|--------------|-------------|----------------------|----------------|--------|----------|---------|--------------|---------------------|------------|--------|--------------|------------|-------------|------------|------------------------------|
| [50]      | 2            | 2           | 0                    | 0              | 0      | 0        | 3       | 0            | 3                   | 0          | 0      | 0            | 0          | 0           | 0          | 0                            |
| [51]      | 3            | 3           | 0                    | 3              | 0      | 0        | 0       | 0            | 0                   | 0          | 0      | 0            | 0          | 0           | 0          | 0                            |
| [52]      | 3            | 2           | 0                    | 0              | 0      | 0        | 0       | 0            | 0                   | 0          | 0      | 3            | 3          | 0           | 0          | 0                            |
| [53]      | 3            | 3           | 0                    | 0              | 0      | 0        | 0       | 0            | 0                   | 0          | 0      | 3            | 3          | 0           | 0          | 0                            |
| [54]      | 2            | 3           | 2                    | 0              | 0      | 0        | 3       | 2            | 0                   | 0          | 0      | 0            | 0          | 0           | 0          | 0                            |
| [55]      | 3            | 1           | 0                    | 0              | 0      | 0        | 3       | 0            | 0                   | 0          | 0      | 0            | 0          | 0           | 0          | 0                            |
| [56]      | 3            | 2           | 0                    | 2              | 0      | 0        | 0       | 0            | 0                   | 0          | 0      | 3            | 0          | 0           | 0          | 3                            |
| [57]      | 3            | 3           | 0                    | 3              | 0      | 0        | 3       | 0            | 3                   | 0          | 0      | 0            | 0          | 0           | 0          | 0                            |
| [58]      | 2            | 2           | 0                    | 0              | 0      | 0        | 3       | 0            | 3                   | 0          | 0      | 0            | 0          | 0           | 0          | 0                            |
| [59]      | 3            | 3           | 0                    | 3              | 0      | 0        | 3       | 0            | 2                   | 0          | 0      | 3            | 3          | 0           | 0          | 0                            |
| [60]      | 3            | 2           | 0                    | 0              | 0      | 0        | 3       | 0            | 3                   | 0          | 0      | 0            | 0          | 0           | 0          | 0                            |
| [61]      | 3            | 1           | 0                    | 0              | 0      | 0        | 3       | 0            | 2                   | 0          | 0      | 0            | 0          | 0           | 0          | 0                            |
| [62]      | 2            | 3           | 0                    | 3              | 0      | 3        | 3       | 1            | 2                   | 3          | 0      | 0            | 0          | 0           | 0          | 0                            |
| [63]      | 2            | 2           | 0                    | 0              | 0      | 0        | 3       | 2            | 3                   | 0          | 0      | 0            | 0          | 0           | 0          | 0                            |
| [64]      | 2            | 3           | 0                    | 0              | 0      | 0        | 3       | 2            | 3                   | 0          | 0      | 0            | 0          | 0           | 0          | 0                            |
| [65]      | 2            | 2           | 0                    | 0              | 0      | 0        | 3       | 0            | 3                   | 0          | 0      | 0            | 0          | 0           | 0          | 0                            |
| [66]      | 3            | 2           | 0                    | 0              | 0      | 0        | 3       | 0            | 2                   | 0          | 0      | 0            | 0          | 0           | 0          | 0                            |
| [67]      | 3            | 1           | 0                    | 0              | 0      | 0        | 3       | 0            | 3                   | 0          | 0      | 0            | 0          | 0           | 0          | 0                            |
| [68]      | 3            | 3           | 0                    | 3              | 0      | 0        | 0       | 0            | 0                   | 0          | 0      | 3            | 0          | 0           | 0          | 3                            |
| [69]      | 2            | 1           | 0                    | 0              | 0      | 0        | 3       | 0            | 3                   | 0          | 0      | 0            | 0          | 0           | 0          | 0                            |
| [70]      | 3            | 1           | 0                    | 0              | 0      | 0        | 2       | 0            | 0                   | 0          | 0      | 0            | 0          | 0           | 0          | 0                            |
| [71]      | 3            | 2           | 0                    | 0              | 0      | 0        | 1       | 0            | 0                   | 0          | 0      | 0            | 0          | 0           | 0          | 0                            |
| [72]      | 3            | 2           | 0                    | 0              | 0      | 2        | 2       | 0            | 0                   | 0          | 0      | 0            | 0          | 0           | 0          | 0                            |
| [73]      | 3            | 3           | 0                    | 0              | 0      | 0        | 3       | 0            | 0                   | 0          | 0      | 3            | 0          | 0           | 0          | 3                            |
| [74]      | 3            | 3           | 0                    | 0              | 0      | 0        | 3       | 0            | 3                   | 0          | 0      | 0            | 0          | 0           | 0          | 0                            |
| [75]      | 3            | 3           | 0                    | 0              | 0      | 0        | 2       | 0            | 2                   | 0          | 0      | 3            | 0          | 0           | 0          | 3                            |
| [76]      | 2            | 3           | 3                    | 0              | 3      | 0        | 1       | 0            | 0                   | 0          | 0      | 3            | 0          | 3           | 0          | 0                            |
| [77]      | 3            | 3           | 0                    | 0              | 0      | 0        | 3       | 0            | 0                   | 0          | 0      | 0            | 0          | 0           | 0          | 0                            |
| [78]      | 3            | 2           | 0                    | 3              | 0      | 0        | 3       | 0            | 0                   | 0          | 3      | 0            | 0          | 0           | 0          | 0                            |
| [79]      | 2            | 3           | 3                    | 0              | 0      | 0        | 1       | 0            | 0                   | 0          | 0      | 0            | 0          | 0           | 0          | 0                            |
| [80]      | 3            | 2           | 0                    | 0              | 0      | 0        | 2       | 0            | 0                   | 0          | 0      | 0            | 0          | 0           | 0          | 0                            |
| [81]      | 2            | 2           | 0                    | 0              | 0      | 0        | 3       | 2            | 0                   | 0          | 3      | 0            | 0          | 0           | 0          | 0                            |



| Reference | Architecture | Performance | Computing/Processing | Storage/Buffer | Energy | Mobility | Routing | Contact type | Route determination | No. copies | Design | Applications | Rural comm | Environment | Smart city | Protocol/Soft Implementation |
|-----------|--------------|-------------|----------------------|----------------|--------|----------|---------|--------------|---------------------|------------|--------|--------------|------------|-------------|------------|------------------------------|
| [82]      | 1            | 1           | 0                    | 0              | 0      | 0        | 3       | 0            | 3                   | 0          | 3      | 0            | 0          | 0           | 0          | 0                            |
| [83]      | 2            | 2           | 0                    | 0              | 0      | 0        | 3       | 0            | 0                   | 0          | 0      | 0            | 0          | 0           | 0          | 0                            |
| [84]      | 2            | 3           | 3                    | 0              | 0      | 0        | 1       | 0            | 0                   | 0          | 0      | 0            | 0          | 0           | 0          | 0                            |
| [85]      | 2            | 1           | 0                    | 0              | 0      | 0        | 1       | 0            | 0                   | 0          | 0      | 3            | 0          | 3           | 0          | 0                            |
| [86]      | 1            | 1           | 0                    | 0              | 0      | 0        | 3       | 0            | 0                   | 0          | 3      | 0            | 0          | 0           | 0          | 0                            |
| [87]      | 1            | 3           | 0                    | 3              | 0      | 1        | 1       | 2            | 0                   | 0          | 2      | 2            | 0          | 0           | 0          | 2                            |
| [88]      | 3            | 2           | 0                    | 0              | 0      | 0        | 1       | 0            | 0                   | 0          | 0      | 0            | 0          | 0           | 0          | 0                            |
| [89]      | 1            | 2           | 0                    | 0              | 0      | 0        | 3       | 2            | 0                   | 0          | 1      | 0            | 0          | 0           | 0          | 0                            |
| [90]      | 1            | 2           | 0                    | 0              | 0      | 0        | 3       | 0            | 2                   | 0          | 3      | 0            | 0          | 0           | 0          | 0                            |
| [91]      | 1            | 3           | 0                    | 0              | 0      | 0        | 2       | 2            | 0                   | 0          | 3      | 0            | 0          | 0           | 0          | 0                            |
| [92]      | 1            | 2           | 0                    | 0              | 0      | 0        | 3       | 0            | 0                   | 0          | 3      | 0            | 0          | 0           | 0          | 0                            |
| [93]      | 1            | 2           | 2                    | 0              | 0      | 0        | 2       | 0            | 0                   | 3          | 3      | 0            | 0          | 0           | 0          | 0                            |
| [94]      | 3            | 1           | 0                    | 0              | 0      | 2        | 1       | 0            | 0                   | 0          | 0      | 0            | 0          | 0           | 0          | 0                            |
| [95]      | 3            | 3           | 0                    | 0              | 0      | 0        | 1       | 0            | 0                   | 0          | 0      | 0            | 0          | 0           | 0          | 0                            |
| [96]      | 1            | 3           | 0                    | 0              | 0      | 0        | 2       | 0            | 2                   | 0          | 0      | 0            | 0          | 0           | 0          | 0                            |
| [97]      | 1            | 3           | 0                    | 0              | 0      | 0        | 1       | 0            | 0                   | 0          | 0      | 0            | 0          | 0           | 0          | 3                            |
| [98]      | 2            | 2           | 0                    | 0              | 0      | 0        | 1       | 3            | 0                   | 0          | 3      | 0            | 0          | 0           | 0          | 0                            |
| [99]      | 3            | 1           | 0                    | 0              | 0      | 0        | 3       | 0            | 0                   | 0          | 0      | 0            | 0          | 0           | 0          | 0                            |
| [100]     | 1            | 1           | 0                    | 0              | 0      | 0        | 1       | 0            | 0                   | 0          | 0      | 0            | 0          | 0           | 0          | 0                            |
| [101]     | 2            | 3           | 3                    | 0              | 0      | 0        | 1       | 0            | 0                   | 0          | 0      | 0            | 0          | 0           | 0          | 0                            |
| [102]     | 1            | 2           | 0                    | 3              | 0      | 0        | 3       | 0            | 3                   | 0          | 3      | 0            | 0          | 0           | 0          | 0                            |
| [103]     | 1            | 2           | 0                    | 0              | 0      | 3        | 3       | 0            | 3                   | 0          | 3      | 0            | 0          | 0           | 0          | 0                            |
| [104]     | 2            | 3           | 0                    | 0              | 0      | 3        | 0       | 0            | 0                   | 0          | 0      | 0            | 0          | 0           | 0          | 0                            |
| [105]     | 3            | 3           | 0                    | 0              | 0      | 0        | 0       | 0            | 0                   | 0          | 0      | 3            | 3          | 0           | 0          | 3                            |
| [106]     | 2            | 2           | 0                    | 0              | 0      | 0        | 2       | 0            | 0                   | 0          | 0      | 0            | 0          | 0           | 0          | 0                            |
| [107]     | 2            | 2           | 0                    | 0              | 0      | 0        | 3       | 0            | 3                   | 0          | 0      | 3            | 0          | 0           | 3          | 3                            |
| [108]     | 2            | 3           | 0                    | 3              | 0      | 0        | 3       | 0            | 0                   | 0          | 0      | 0            | 0          | 0           | 0          | 0                            |
| [109]     | 2            | 2           | 0                    | 0              | 0      | 3        | 3       | 0            | 3                   | 0          | 0      | 0            | 0          | 0           | 0          | 0                            |
| [110]     | 2            | 3           | 0                    | 3              | 0      | 0        | 3       | 0            | 0                   | 3          | 0      | 0            | 0          | 0           | 0          | 0                            |
| [111]     | 2            | 2           | 3                    | 0              | 3      | 0        | 3       | 0            | 3                   | 0          | 3      | 0            | 0          | 0           | 0          | 0                            |
| [112]     | 2            | 2           | 3                    | 0              | 0      | 0        | 3       | 0            | 0                   | 0          | 3      | 0            | 0          | 0           | 0          | 0                            |
| [113]     | 2            | 3           | 3                    | 0              | 0      | 0        | 2       | 2            | 0                   | 0          | 0      | 0            | 0          | 0           | 0          | 0                            |







| Reference | Architecture | Performance | Computing/Processing | Storage/Buffer | Energy | Mobility | Routing | Contact type | Route determination | No. copies | Design | Applications | Rural comm | Environment | Smart city | Protocol/Soft Implementation |
|-----------|--------------|-------------|----------------------|----------------|--------|----------|---------|--------------|---------------------|------------|--------|--------------|------------|-------------|------------|------------------------------|
| [146]     | 2            | 3           | 0                    | 3              | 0      | 0        | 0       | 0            | 0                   | 0          | 0      | 0            | 0          | 0           | 0          | 0                            |
| [147]     | 1            | 2           | 0                    | 0              | 0      | 3        | 3       | 3            | 3                   | 0          | 3      | 0            | 0          | 0           | 0          | 0                            |
| [148]     | 1            | 3           | 0                    | 3              | 0      | 3        | 2       | 0            | 2                   | 0          | 0      | 0            | 0          | 0           | 0          | 0                            |
| [149]     | 1            | 3           | 0                    | 0              | 0      | 3        | 3       | 0            | 3                   | 0          | 3      | 0            | 0          | 0           | 0          | 0                            |
| [150]     | 1            | 3           | 0                    | 0              | 0      | 3        | 3       | 0            | 3                   | 0          | 0      | 0            | 0          | 0           | 0          | 0                            |
| [151]     | 1            | 2           | 0                    | 0              | 0      | 0        | 3       | 3            | 3                   | 0          | 0      | 0            | 0          | 0           | 0          | 0                            |
| [152]     | 1            | 3           | 0                    | 0              | 0      | 0        | 3       | 2            | 3                   | 0          | 3      | 0            | 0          | 0           | 0          | 0                            |
| [153]     | 1            | 3           | 0                    | 3              | 0      | 0        | 0       | 0            | 0                   | 0          | 0      | 0            | 0          | 0           | 0          | 0                            |
| [154]     | 1            | 2           | 0                    | 0              | 0      | 2        | 3       | 3            | 3                   | 0          | 0      | 0            | 0          | 0           | 0          | 0                            |
| [155]     | 1            | 3           | 0                    | 0              | 0      | 3        | 3       | 2            | 2                   | 0          | 0      | 0            | 0          | 0           | 0          | 0                            |
| [156]     | 2            | 3           | 3                    | 0              | 0      | 0        | 3       | 0            | 0                   | 0          | 0      | 3            | 0          | 0           | 0          | 3                            |
| [157]     | 2            | 3           | 0                    | 2              | 3      | 0        | 0       | 0            | 0                   | 0          | 0      | 3            | 0          | 0           | 0          | 3                            |
| [158]     | 1            | 2           | 0                    | 0              | 0      | 0        | 0       | 0            | 0                   | 0          | 0      | 0            | 0          | 0           | 0          | 0                            |
| [159]     | 1            | 2           | 0                    | 2              | 3      | 0        | 3       | 0            | 2                   | 3          | 3      | 0            | 0          | 0           | 0          | 0                            |
| [160]     | 1            | 2           | 0                    | 0              | 0      | 2        | 3       | 3            | 2                   | 0          | 0      | 0            | 0          | 0           | 0          | 0                            |
| [161]     | 1            | 3           | 0                    | 0              | 0      | 3        | 3       | 0            | 2                   | 3          | 3      | 0            | 0          | 0           | 0          | 0                            |
| [162]     | 2            | 3           | 3                    | 0              | 0      | 0        | 2       | 0            | 2                   | 0          | 0      | 0            | 0          | 0           | 0          | 0                            |
| [163]     | 1            | 2           | 0                    | 0              | 0      | 3        | 0       | 0            | 0                   | 0          | 0      | 0            | 0          | 0           | 0          | 0                            |
| [164]     | 1            | 2           | 0                    | 0              | 0      | 3        | 3       | 2            | 3                   | 0          | 3      | 0            | 0          | 0           | 0          | 0                            |
| [165]     | 1            | 3           | 2                    | 0              | 0      | 0        | 3       | 3            | 2                   | 0          | 0      | 0            | 0          | 0           | 0          | 0                            |
| [166]     | 1            | 2           | 0                    | 3              | 0      | 0        | 3       | 3            | 2                   | 3          | 3      | 0            | 0          | 0           | 0          | 0                            |
| [167]     | 1            | 2           | 0                    | 0              | 0      | 2        | 3       | 2            | 3                   | 0          | 0      | 0            | 0          | 0           | 0          | 0                            |
| [168]     | 1            | 3           | 1                    | 3              | 3      | 0        | 3       | 1            | 3                   | 0          | 0      | 0            | 0          | 0           | 0          | 0                            |
| [169]     | 1            | 3           | 0                    | 3              | 0      | 0        | 3       | 0            | 2                   | 0          | 3      | 0            | 0          | 0           | 0          | 0                            |
| [170]     | 2            | 3           | 0                    | 3              | 0      | 0        | 2       | 0            | 2                   | 3          | 0      | 0            | 0          | 0           | 0          | 0                            |
| [171]     | 2            | 3           | 0                    | 3              | 0      | 0        | 3       | 0            | 0                   | 3          | 0      | 0            | 0          | 0           | 0          | 0                            |
| [172]     | 2            | 3           | 3                    | 3              | 0      | 0        | 1       | 0            | 0                   | 0          | 0      | 0            | 0          | 0           | 0          | 0                            |
| [173]     | 1            | 2           | 0                    | 2              | 0      | 0        | 0       | 0            | 0                   | 0          | 0      | 3            | 0          | 0           | 0          | 3                            |
| [174]     | 1            | 2           | 0                    | 0              | 0      | 2        | 1       | 0            | 0                   | 0          | 0      | 3            | 3          | 0           | 3          | 0                            |
| [175]     | 2            | 2           | 2                    | 0              | 0      | 0        | 3       | 2            | 3                   | 0          | 3      | 0            | 0          | 0           | 0          | 0                            |

| Reference | Architecture | Performance | Computing/Processing | Storage/Buffer | Energy | Mobility | Routing | Contact type | Route determination | No. copies | Design | Applications | Rural comm | Environment | Smart city | Protocol/Soft Implementation |
|-----------|--------------|-------------|----------------------|----------------|--------|----------|---------|--------------|---------------------|------------|--------|--------------|------------|-------------|------------|------------------------------|
| [176]     | 1            | 2           | 0                    | 3              | 0      | 0        | 3       | 2            | 0                   | 3          | 3      | 0            | 0          | 0           | 0          | 0                            |
| [177]     | 1            | 2           | 3                    | 0              | 0      | 0        | 3       | 2            | 3                   | 0          | 3      | 0            | 0          | 0           | 0          | 0                            |
| [178]     | 1            | 2           | 3                    | 2              | 0      | 3        | 3       | 2            | 2                   | 3          | 3      | 0            | 0          | 0           | 0          | 0                            |
| [179]     | 0            | 2           | 0                    | 3              | 0      | 0        | 3       | 0            | 0                   | 3          | 3      | 0            | 0          | 0           | 0          | 0                            |
| [180]     | 2            | 3           | 0                    | 0              | 0      | 3        | 3       | 3            | 0                   | 0          | 3      | 0            | 0          | 0           | 0          | 0                            |
| [181]     | 2            | 3           | 0                    | 0              | 3      | 3        | 3       | 3            | 2                   | 0          | 0      | 0            | 0          | 0           | 0          | 0                            |
| [182]     | 1            | 3           | 0                    | 0              | 3      | 0        | 0       | 0            | 0                   | 0          | 0      | 0            | 0          | 0           | 0          | 0                            |
| [183]     | 0            | 3           | 0                    | 3              | 0      | 2        | 2       | 0            | 0                   | 2          | 0      | 0            | 0          | 0           | 0          | 0                            |
| [184]     | 0            | 3           | 0                    | 0              | 3      | 3        | 3       | 2            | 2                   | 0          | 3      | 0            | 0          | 0           | 0          | 0                            |
| [185]     | 0            | 3           | 0                    | 2              | 0      | 3        | 2       | 0            | 2                   | 2          | 0      | 0            | 0          | 0           | 0          | 0                            |
| [186]     | 0            | 3           | 0                    | 0              | 0      | 3        | 2       | 2            | 2                   | 0          | 0      | 0            | 0          | 0           | 0          | 0                            |
| [187]     | 0            | 3           | 0                    | 2              | 0      | 3        | 1       | 1            | 1                   | 0          | 0      | 0            | 0          | 0           | 0          | 0                            |
| [188]     | 1            | 3           | 0                    | 3              | 0      | 0        | 3       | 0            | 0                   | 3          | 3      | 0            | 0          | 0           | 0          | 0                            |
| [189]     | 2            | 3           | 0                    | 3              | 0      | 1        | 1       | 1            | 1                   | 0          | 0      | 0            | 0          | 0           | 0          | 0                            |
| [190]     | 2            | 3           | 0                    | 3              | 0      | 3        | 2       | 1            | 2                   | 0          | 0      | 0            | 0          | 0           | 0          | 0                            |
| [191]     | 3            | 2           | 0                    | 0              | 0      | 2        | 3       | 0            | 3                   | 0          | 0      | 0            | 0          | 0           | 0          | 0                            |
| [192]     | 2            | 3           | 0                    | 3              | 0      | 2        | 3       | 3            | 1                   | 3          | 0      | 0            | 0          | 0           | 0          | 0                            |
| [193]     | 2            | 2           | 0                    | 2              | 0      | 0        | 3       | 3            | 0                   | 2          | 3      | 0            | 0          | 0           | 0          | 0                            |
| [194]     | 2            | 2           | 0                    | 0              | 0      | 2        | 2       | 0            | 2                   | 0          | 0      | 3            | 0          | 3           | 0          | 0                            |
| [195]     | 3            | 3           | 0                    | 0              | 0      | 0        | 0       | 0            | 0                   | 0          | 0      | 0            | 0          | 0           | 0          | 0                            |
| [196]     | 1            | 3           | 0                    | 3              | 0      | 0        | 3       | 3            | 3                   | 0          | 0      | 0            | 0          | 0           | 0          | 0                            |
| [197]     | 3            | 0           | 0                    | 0              | 0      | 0        | 0       | 0            | 0                   | 0          | 0      | 0            | 0          | 0           | 0          | 0                            |
| [198]     | 3            | 0           | 0                    | 0              | 0      | 0        | 0       | 0            | 0                   | 0          | 0      | 0            | 0          | 0           | 0          | 0                            |
| [199]     | 3            | 2           | 0                    | 0              | 3      | 0        | 0       | 0            | 0                   | 0          | 0      | 0            | 0          | 0           | 0          | 0                            |
| [200]     | 3            | 3           | 0                    | 0              | 0      | 0        | 3       | 0            | 0                   | 0          | 0      | 0            | 0          | 0           | 0          | 0                            |
| [201]     | 3            | 0           | 0                    | 0              | 0      | 0        | 0       | 0            | 0                   | 0          | 0      | 0            | 0          | 0           | 0          | 0                            |
| [202]     | 3            | 0           | 0                    | 0              | 0      | 0        | 3       | 0            | 0                   | 0          | 0      | 0            | 0          | 0           | 0          | 0                            |
| [203]     | 3            | 2           | 0                    | 0              | 0      | 2        | 0       | 0            | 0                   | 0          | 0      | 3            | 0          | 0           | 1          | 3                            |
| [204]     | 3            | 3           | 0                    | 0              | 0      | 2        | 0       | 0            | 0                   | 0          | 0      | 3            | 0          | 3           | 0          | 3                            |



## References:

50. Raffelsberger, H. *Overview of Hybrid MANET-DTN Networking and Its Potential for Emergency Response Operations*; TU Berlin: Berlin, Germany, 2013. <https://doi.org/10.14279/tuj.eceasst.56.813.808>.
51. Usino, W.; Damanik, H.A.; Anggraeni, M. A Satellite LTE Delay Tolerant Capabilities Tunnelling: Design and Performance Evaluation. *J. Phys. Conf. Ser.* **2019**, *1192*, 012047. <https://doi.org/10.1088/1742-6596/1192/1/012047>.
52. Husni, E. Rural Internet Service System Based on Delay Tolerant Network (DTN) Using Train System. In Proceedings of the 2011 International Conference on Electrical Engineering and Informatics, Bandung, Indonesia, 17–19 July 2011. <https://doi.org/10.1109/ICEEI.2011.6021823>.
53. Guo, S.; Falaki, M.H.; Oliver, E.A.; Rahman, S.U.; Seth, A.; Zaharia, M.A.; Keshav, S. Very low-cost internet access using KioskNet. *ACM SIGCOMM Comput. Commun. Rev.* **2007**, *37*, 95–100. <https://doi.org/10.1145/1290168.1290181>.
54. Silva, A.P.; Burleigh, S.; Hirata, C.M.; Obraczka, K. Congestion control in disruption-tolerant networks: A comparative study for interplanetary and terrestrial networking applications. *Ad Hoc Netw.* **2016**, *44*, 1–18. <https://doi.org/10.1016/j.adhoc.2016.02.004>.
55. Godha, P.; Jadon, S.; Patle, A.; Gupta, I.; Sharma, B.; Singh, A.K. Architecture, an efficient routing, applications, and challenges in delay tolerant network. In Proceedings of the 2019 International Conference on Intelligent Computing and Control Systems (ICCS), Chongqing, China, 6–8 December 2019; pp. 824–829. <https://doi.org/10.1109/ICCS45141.2019.9065315>.
56. Lonkar, P.; Chaudhari, S.; Chouskey, P. A Review on DTN Implementation on Android Platform for Social Needs. *Int. J. Comp. Eng. Appl.* **2018**, *12*, doi: 10.13140/RG.2.2.24070.42566
57. Singh, D.; Indora, S.; Rani, A.; Sharma, A. Routing Policies & Strategies in Delay Tolerant Network. *Int. J. Eng. Res. Appl. (IJERA)* **2014**. Available Online: [https://www.google.com/url?sa=t&source=web&rct=j&opi=89978449&url=https://www.ijera.com/special\\_issue/AET\\_Mar\\_2014/CSE/Version%2520%25202/F2329.pdf&ved=2ahUKEwi8yeSh-f2GAxVN\\_gIHHbjmBiwQFnoECBQQAQ&usq=AOvVaw3PGMxHGyjiqN7kBFZS0ylO](https://www.google.com/url?sa=t&source=web&rct=j&opi=89978449&url=https://www.ijera.com/special_issue/AET_Mar_2014/CSE/Version%2520%25202/F2329.pdf&ved=2ahUKEwi8yeSh-f2GAxVN_gIHHbjmBiwQFnoECBQQAQ&usq=AOvVaw3PGMxHGyjiqN7kBFZS0ylO) (accessed on 6 December 2024).
58. Shih, T.K.; Cho, H.-H.; Chen, C.-Y.; Chao, H.-C. Survey on underwater delay/disruption tolerant wireless sensor network routing. *IET Wirel. Sens. Syst.* **2014**, *4*, 112–121. <https://doi.org/10.1049/iet-wss.2013.0118>.
59. Cello, M.; Marchese, M.; Patrone, F. Research Challenges in Nanosatellite-DTN Networks, Personal Satellite Services. In Proceedings of the Next-Generation Satellite Networking and Communication Systems: 6th International Conference, PSATS 2014, Genoa, Italy, 28–29 July 2014; Revised Selected Papers; Springer: Berlin/Heidelberg, Germany, 2016; pp. 89–93.
60. Shubashini, B.; Thanamani, A.S. An Opportunistic on Routing Protocols and Persisting Challenges in Delay-Tolerant Networking. *Int. J. Innov. Res. Comput. Commun. Eng.* **2014**, *2*, 5373–5379.
61. Pereira, P.R.; Casaca, A.; Rodrigues, J.J.P.C.; Soares, V.N.G.J.; Triay, J.; Cervello-Pastor, C. From Delay-Tolerant Networks to Vehicular Delay-Tolerant Networks. *IEEE Commun. Surv. Tutor.* **2011**, *14*, 1166–1182. <https://doi.org/10.1109/surv.2011.081611.00102>.
62. Benamar, N.; Singh, K.D.; Benamar, M.; El Ouadghiri, D.; Bonnin, J.-M. Routing protocols in Vehicular Delay Tolerant Networks: A comprehensive survey. *Comput. Commun.* **2014**, *48*, 141–158. <https://doi.org/10.1016/j.comcom.2014.03.024>.
63. Zhang, Z. Routing in intermittently connected mobile ad hoc networks and delay tolerant networks: Overview and challenges. *IEEE Commun. Surv. Tutor.* **2006**, *8*, 24–37. <https://doi.org/10.1109/comst.2006.323440>
64. Almelu, S.; Deen, A.J.; Silakari, S. Delay tolerant network routing protocol: A comprehensive survey with hybrid technique. *Int. J. Res. Eng. Technol. IJETR* **2015**, *4*, 481–487.
65. Arif, M.; Daud, A. Adaptive Routing Techniques in Disruption Tolerant Networks. In *International Conference on Web and Semantic Technology*; Springer: Berlin/Heidelberg, Germany, 2010; pp. 336–348.
66. Khabbaz, M.J.; Assi, C.M.; Fawaz, W.F. Disruption-tolerant networking: A comprehensive survey on recent developments and persisting challenges. *IEEE Commun. Surv. Tutor.* **2011**, *14*, 607–640.

67. Bouk, S.H.; Ahmed, S.H.; Kim, D. Delay Tolerance in Underwater Wireless Communications: A Routing Perspective. *Mob. Inf. Syst.* **2016**, *2016*, 1–9. <https://doi.org/10.1155/2016/6574697>.
68. Sundararaj, L.; Vellaiyan, P. Throughput Enhancement in AUDTWMN Using Throwboxes—An Overview. *Int. J. Comput. Inf. Eng. World Acad. Sci. Eng. Technol.* **2010**, *4*, 1583–1591.
69. Arora, P.; Jain, S. Underwater sensor network delay aware routing protocols: A survey. In Proceedings of 3rd International Conference on Internet of Things and Connected Technologies (ICIOTCT), Jaipur, India, 26–27 March 2018; pp. 26–27.
70. Trifunovic, S.; Kouyoumdjieva, S.T.; Distl, B.; Pajevic, L.; Karlsson, G.; Plattner, B. A Decade of Research in Opportunistic Networks: Challenges, Relevance, and Future Directions. *IEEE Commun. Mag.* **2017**, *55*, 168–173. <https://doi.org/10.1109/mcom.2017.1500527cm>.
71. Marshall, P.F. Recent progress in moving cognitive radio and services to deployment. In Proceedings of the 2008 International Symposium on a World of Wireless, Mobile and Multimedia Networks, Newport Beach, CA, USA, 23–26 June 2008.
72. Li, Y.; Bartos, R. A survey of protocols for intermittently connected delay-tolerant wireless sensor networks. *J. Netw. Comput. Appl.* **2014**, *41*, 411–423.
73. Matracia, M.; Saeed, N.; Kishk, M.A.; Alouini, M.-S. Post-disaster communications: Enabling technologies, architectures, and open challenges. *IEEE Open J. Commun. Soc.* **2022**, *3*, 1177–1205.
74. Araniti, G.; Bisio, I.; De Sanctis, M. State of the art and innovative communications and networking solutions for a reliable and efficient Interplanetary Internet. *Int. J. Adv. Internet Technol.* **2010**, *3*.
75. Gou, L.; Zhang, G.; Zhang, W.; Bian, D. Cluster-based architecture and network model for InterPlaNetary Internet. *J. Commun. Inf. Netw.* **2016**, *1*, 51–66.
76. Debnath, S.; Arif, W.; Roy, S.; Baishya, S.; Sen, D. A comprehensive survey of emergency communication network and management. *Wirel. Pers. Commun.* **2022**, *124*, 1375–1421.
77. Dalal, R.; Khari, M.; Anzola, J.P.; García-Díaz, V. Proliferation of opportunistic routing: A systematic review. *IEEE Access* **2021**, *10*, 5855–5883.
78. Babich, F.; Comisso, M.; Cuttin, A.; Marchese, M.; Patrone, F. Nanosatellite-5G Integration in the Millimeter Wave Domain: A Full Top-Down Approach. *IEEE Trans. Mob. Comput.* **2019**, *19*, 390–404. <https://doi.org/10.1109/tmc.2019.2897091>.
79. Khabbaz, M.J.; Fawaz, W.F.; Assi, C.M. Modeling and Delay Analysis of Intermittently Connected Roadside Communication Networks. *IEEE Trans. Veh. Technol.* **2012**, *61*, 2698–2706. <https://doi.org/10.1109/tvt.2012.2200001>.
80. Caini, C.; Cruickshank, H.; Farrell, S.; Marchese, M. Delay- and Disruption-Tolerant Networking (DTN): An Alternative Solution for Future Satellite Networking Applications. *Proc. IEEE* **2011**, *99*, 1980–1997. <https://doi.org/10.1109/jproc.2011.2158378>.
81. Lu, R.; Lin, X.; Zhu, H.; Shen, X.; Preiss, B. Pi: A practical incentive protocol for delay tolerant networks. *IEEE Trans. Wirel. Commun.* **2010**, *9*, 1483–1493. <https://doi.org/10.1109/twc.2010.04.090557>.
82. Chen, K.; Shen, H. DTN-FLOW: Inter-Landmark Data Flow for High-Throughput Routing in DTNs. *IEEE/ACM Trans. Netw.* **2014**, *23*, 212–226. <https://doi.org/10.1109/tnet.2013.2296751>.
83. Falcão, D.; Salles, R.; Maranhão, P. Performance evaluation of disruption tolerant networks on warships' tactical messages for secure transmissions. *J. Commun. Netw.* **2021**, *23*, 473–487. <https://doi.org/10.23919/jcn.2021.000043>.
84. Huang, M.; Chen, S.; Zhu, Y.; Wang, Y. Topology Control for Time-Evolving and Predictable Delay-Tolerant Networks. *IEEE Trans. Comput.* **2012**, *62*, 2308–2321. <https://doi.org/10.1109/tc.2012.220>.
85. Ochiai, H.; Ishizuka, H.; Kawakami, Y.; Esaki, H. A DTN-Based Sensor Data Gathering for Agricultural Applications. *IEEE Sens. J.* **2011**, *11*, 2861–2868. <https://doi.org/10.1109/jsen.2011.2170562>.
86. Fu, Q.; Krishnamachari, B.; Zhang, L. DAWN: A density adaptive routing for deadline-based data collection in vehicular delay tolerant networks. *Tsinghua Sci. Technol.* **2013**, *18*, 230–241. <https://doi.org/10.1109/tst.2013.6522582>.
87. Lee, C.; Rhee, J.-K.K. Efficient Design and Scalable Control for Store-and-Forward Capable Optical Transport Networks. *J. Opt. Commun. Netw.* **2017**, *9*, 699–710. <https://doi.org/10.1364/jocn.9.000699>.
88. Birrane, E.J.; Heiner, S.; McKeever, K. Delay-Tolerant Security Architecture Elements. In *Securing Delay-Tolerant Networks with BPSec*; Wiley: Hoboken, NJ, USA, 2023, pp. 51–70. <https://doi.org/10.1002/9781119823513.ch4>.
89. Zhu, Y.; Xu, B.; Shi, X.; Wang, Y. A Survey of Social-Based Routing in Delay Tolerant Networks: Positive and Negative Social Effects. *IEEE Commun. Surv. Tutor.* **2012**, *15*, 387–401. <https://doi.org/10.1109/surv.2012.032612.00004>.

90. Balasubramanian, A.; Levine, B.N.; Venkataramani, A. Replication Routing in DTNs: A Resource Allocation Approach. *IEEE/ACM Trans. Netw.* **2009**, *18*, 596–609. <https://doi.org/10.1109/tnet.2009.2036365>.
91. Li, Y.; Hui, P.; Jin, D.; Su, L.; Zeng, L. Evaluating the Impact of Social Selfishness on the Epidemic Routing in Delay Tolerant Networks. *IEEE Commun. Lett.* **2010**, *14*, 1026–1028. <https://doi.org/10.1109/lcomm.2010.093010.100492>.
92. Lu, Z.; Sun, X.; Wen, Y.; Cao, G.; La Porta, T. Algorithms and Applications for Community Detection in Weighted Networks. *IEEE Trans. Parallel Distrib. Syst.* **2014**, *26*, 2916–2926. <https://doi.org/10.1109/tpds.2014.2370031>.
93. Abdelkader, T.; Naik, K.; Nayak, A.; Goel, N.; Srivastava, V. SGBR: A Routing Protocol for Delay Tolerant Networks Using Social Grouping. *IEEE Trans. Parallel Distrib. Syst.* **2012**, *24*, 2472–2481. <https://doi.org/10.1109/tpds.2012.235>.
94. Li, F.; Chen, S.; Huang, M.; Yin, Z.; Zhang, C.; Wang, Y. Reliable Topology Design in Time-Evolving Delay-Tolerant Networks with Unreliable Links. *IEEE Trans. Mob. Comput.* **2014**, *14*, 1301–1314. <https://doi.org/10.1109/tmc.2014.2345392>.
95. Guo, H.; Li, J.; Qian, Y. HoP-DTN: Modeling and Evaluation of Homing-Pigeon-Based Delay-Tolerant Networks. *IEEE Trans. Veh. Technol.* **2009**, *59*, 857–868. <https://doi.org/10.1109/tvt.2009.2033803>.
96. Mahendran, V.; Gunasekaran, R.; Murthy, C.S.R. Performance Modeling of Delay-Tolerant Network Routing via Queueing Petri Nets. *IEEE Trans. Mob. Comput.* **2013**, *13*, 1816–1828. <https://doi.org/10.1109/tmc.2013.25>.
97. Su, Y.; Fan, R.; Jin, Z. ORIT: A Transport Layer Protocol Design for Underwater DTN Sensor Networks. *IEEE Access* **2019**, *7*, 69592–69603. <https://doi.org/10.1109/access.2019.2918561>.
98. Han, C.; Yao, H.; Mai, T.; Zhang, N.; Guizani, M. QMIX Aided Routing in Social-Based Delay-Tolerant Networks. *IEEE Trans. Veh. Technol.* **2022**, *71*, 1952–1963. <https://doi.org/10.1109/TVT.2021.3133449>.
99. Fall, K.; Farrell, S. DTN: An architectural retrospective. *IEEE J. Sel. Areas Commun.* **2008**, *26*, 828–836. <https://doi.org/10.1109/jsac.2008.080609>.
100. Zhu, H.; Du, S.; Gao, Z.; Dong, M.; Cao, Z. A Probabilistic Misbehavior Detection Scheme toward Efficient Trust Establishment in Delay-Tolerant Networks. *IEEE Trans. Parallel Distrib. Syst.* **2013**, *25*, 22–32. <https://doi.org/10.1109/tpds.2013.36>.
101. Li, Y.; Qian, M.; Jin, D.; Hui, P.; Wang, Z.; Chen, S. Multiple Mobile Data Offloading Through Disruption Tolerant Networks. *IEEE Trans. Mob. Comput.* **2013**, *13*, 1579–1596. <https://doi.org/10.1109/tmc.2013.61>.
102. Li, F.; Jiang, H.; Li, H.; Cheng, Y.; Wang, Y. SEBAR: Social-Energy-Based Routing for Mobile Social Delay-Tolerant Networks. *IEEE Trans. Veh. Technol.* **2017**, *66*, 7195–7206. <https://doi.org/10.1109/tvt.2017.2653843>.
103. Zhu, K.; Li, W.; Fu, X. SMART: A Social- and Mobile-Aware Routing Strategy for Disruption-Tolerant Networks. *IEEE Trans. Veh. Technol.* **2014**, *63*, 3423–3434. <https://doi.org/10.1109/tvt.2014.2298494>.
104. Agarwal, A.; Starobinski, D.; Little, T.D.C. Phase Transition of Message Propagation Speed in Delay-Tolerant Vehicular Networks. *IEEE Trans. Intell. Transp. Syst.* **2011**, *13*, 249–263. <https://doi.org/10.1109/tits.2011.2168954>.
105. Marchese, M.; Patrone, F.; Cello, M. DTN-Based Nanosatellite Architecture and Hot Spot Selection Algorithm for Remote Areas Connection. *IEEE Trans. Veh. Technol.* **2017**, *67*, 689–702. <https://doi.org/10.1109/tvt.2017.2739298>.
106. Peng, W.; Li, F.; Zou, X.; Wu, J. Behavioral Malware Detection in Delay Tolerant Networks. *IEEE Trans. Parallel Distrib. Syst.* **2014**, *25*, 53–63. <https://doi.org/10.1109/TPDS.2013.27>.
107. Cui, J.; Cao, S.; Chang, Y.; Wu, L.; Liu, D.; Yang, Y. An Adaptive Spray and Wait Routing Algorithm Based on Quality of Node in Delay Tolerant Network. *IEEE Access* **2020**, *7*, 35274–35286. <https://doi.org/10.1109/access.2019.2904750>.
108. Mahendran, V.; Murthy, C.S.R. Buffer Dimensioning of DTN Replication-Based Routing Nodes. *IEEE Commun. Lett.* **2012**, *17*, 123–126. <https://doi.org/10.1109/lcomm.2012.120312.122262>.
109. Qi, W.; Song, Q.; Wang, X.; Guo, L. Trajectory Data Mining-Based Routing in DTN-Enabled Vehicular Ad Hoc Networks. *IEEE Access* **2017**, *5*, 24128–24138. <https://doi.org/10.1109/access.2017.2768485>.
110. Atakora, M.; Chenji, H. Multicast Techniques for Hybrid RF/FSO DTNs. *J. Opt. Commun. Netw.* **2017**, *9*, 1051–1061. <https://doi.org/10.1364/jocn.9.001051>.
111. de Andrade, G.E.; Junior, L.A.P.L.; Calsavara, A.; Michelon, G.A.; Brussamolin, V. A Greedy Routing Strategy Based on Euclidean Geometry for Vehicular Delay Tolerant Network. *IEEE Lat. Am. Trans.* **2018**, *16*, 2000–2006. <https://doi.org/10.1109/TLA.2018.8447368>.
112. Wang, H.; Wang, H.; Tan, J.; Lv, H.; Zhu, M. A Delay Tolerant Network Routing Policy Based on Optimized Control Information Generation Method. *IEEE Access* **2018**, *6*, 51791–51803. <https://doi.org/10.1109/access.2018.2869380>.



113. Rong, W.; Yahui, W.; Hongbin, H.; Su, D. Cooperative transmission in delay tolerant network. *J. Syst. Eng. Electron.* **2019**, *30*, 30–36. <https://doi.org/10.21629/jsee.2019.01.04>.
114. Pathirana, P.; Bulusu, N.; Savkin, A.; Jha, S. Node localization using mobile robots in delay-tolerant sensor networks. *IEEE Trans. Mob. Comput.* **2005**, *4*, 285–296. <https://doi.org/10.1109/tmc.2005.43>.
115. Choi, B.J.; Shen, X. Adaptive Asynchronous Sleep Scheduling Protocols for Delay Tolerant Networks. *IEEE Trans. Mob. Comput.* **2010**, *10*, 1283–1296. <https://doi.org/10.1109/tmc.2010.229>.
116. Pham, T.N.D.; Yeo, C.K. Detecting Colluding Blackhole and Greyhole Attacks in Delay Tolerant Networks. *IEEE Trans. Mob. Comput.* **2015**, *15*, 1116–1129. <https://doi.org/10.1109/tmc.2015.2456895>.
117. Gao, L.; Luan, T.H.; Yu, S.; Zhou, W.; Liu, B. FogRoute: DTN-based Data Dissemination Model in Fog Computing. *IEEE Internet Things J.* **2016**, *4*, 225–235. <https://doi.org/10.1109/jiot.2016.2645559>.
118. Cho, J.-H.; Chen, I.-R. PROVEST: Provenance-Based Trust Model for Delay Tolerant Networks. *IEEE Trans. Dependable Secur. Comput.* **2016**, *15*, 151–165. <https://doi.org/10.1109/tdsc.2016.2530705>.
119. Li, Y.; Wang, Z.; Jin, D.; Su, L.; Zeng, L.; Chen, S. Optimal Beaconing Control for Epidemic Routing in Delay-Tolerant Networks. *IEEE Trans. Veh. Technol.* **2011**, *61*, 311–320. <https://doi.org/10.1109/tvt.2011.2174262>.
120. Picu, A.; Spyropoulos, T. DTN-Meteo: Forecasting the Performance of DTN Protocols Under Heterogeneous Mobility. *IEEE/ACM Trans. Netw.* **2014**, *23*, 587–602. <https://doi.org/10.1109/tnet.2014.2301376>.
121. Iranmanesh, S.; Raad, R.; Raheel, M.S.; Tubbal, F.; Jan, T. Novel DTN Mobility-Driven Routing in Autonomous Drone Logistics Networks. *IEEE Access* **2020**, *8*, 13661–13673. <https://doi.org/10.1109/ACCESS.2019.2959275>.
122. Li, Z.; Liu, Y.; Zhu, H.; Sun, L. Coff: Contact-Duration-Aware Cellular Traffic Offloading Over Delay Tolerant Networks. *IEEE Trans. Veh. Technol.* **2014**, *64*, 5257–5268. <https://doi.org/10.1109/tvt.2014.2381220>.
123. Qin, S.; Feng, G.; Zhang, Y. How the Contact-Probing Mechanism Affects the Transmission Capacity of Delay-Tolerant Networks. *IEEE Trans. Veh. Technol.* **2011**, *60*, 1825–1834. <https://doi.org/10.1109/tvt.2011.2131693>.
124. Sakai, K.; Sun, M.-T.; Ku, W.-S.; Wu, J.; Alanazi, F.S. Performance and Security Analyses of Onion-Based Anonymous Routing for Delay Tolerant Networks. *IEEE Trans. Mob. Comput.* **2017**, *16*, 3473–3487. <https://doi.org/10.1109/tmc.2017.2690634>.
125. Pham, T.N.D.; Yeo, C.K.; Yanai, N.; Fujiwara, T. Detecting Flooding Attack and Accommodating Burst Traffic in Delay-Tolerant Networks. *IEEE Trans. Veh. Technol.* **2018**, *67*, 795–808. <https://doi.org/10.1109/TVT.2017.2748345>.
126. Li, W.; Hu, Y.; Fu, X.; Lu, S.; Chen, D. Cooperative Positioning and Tracking in Disruption Tolerant Networks. *IEEE Trans. Parallel Distrib. Syst.* **2014**, *26*, 382–391. <https://doi.org/10.1109/tpds.2014.2310471>.
127. Wang, H.; Wang, H.; Guo, F.; Feng, G.; Lv, H. ARAG: A Routing Algorithm Based on Incentive Mechanisms for DTN With Nodes' Selfishness. *IEEE Access* **2018**, *6*, 29419–29425. <https://doi.org/10.1109/ACCESS.2018.2834912>.
128. Li, F.; Yin, Z.; Tang, S.; Cheng, Y.; Wang, Y. Optimization Problems in Throwbox-Assisted Delay Tolerant Networks: Which Throwboxes to Activate? How Many Active Ones I Need? *IEEE Trans. Comput.* **2015**, *65*, 1663–1670. <https://doi.org/10.1109/tc.2015.2451621>.
129. Vazintari, A.; Cottis, P.G. Mobility Management in Energy Constrained Self-Organizing Delay Tolerant Networks: An Autonomic Scheme Based on Game Theory. *IEEE Trans. Mob. Comput.* **2015**, *15*, 1401–1411. <https://doi.org/10.1109/tmc.2015.2462951>.
130. Alim, A.; Li, X.; Nguyen, N.P.; Thai, M.T.; Helal, A. Structural Vulnerability Assessment of Community-Based Routing in Opportunistic Networks. *IEEE Trans. Mob. Comput.* **2016**, *15*, 3156–3170. <https://doi.org/10.1109/tmc.2016.2524571>.
131. Maia, S.L.F.; Silva, E.R.; Guardieiro, P.R. A New Optimization Strategy Proposal for Multi-Copy Forwarding in Energy Constrained DTNs. *IEEE Commun. Lett.* **2014**, *18*, 1623–1626. <https://doi.org/10.1109/lcomm.2014.2346488>.
132. Cello, M.; Gnecco, G.; Marchese, M.; Sanguineti, M. Evaluation of the Average Packet Delivery Delay in Highly-Disrupted Networks: The DTN and IP-like Protocol Cases. *IEEE Commun. Lett.* **2014**, *18*, 519–522. <https://doi.org/10.1109/LCOMM.2014.011314.132522>.
133. Wu, Y.; Deng, S.; Huang, H. Control of Message Transmission in Delay/Disruption Tolerant Network. *IEEE Trans. Comput. Soc. Syst.* **2017**, *5*, 132–143. <https://doi.org/10.1109/tcss.2017.2776322>.
134. Zhou, J.; Li, J.; Qian, Y.; Roy, S.; Mitchell, K. Quasi-Optimal Dual-Phase Scheduling for Pigeon Networks. *IEEE Trans. Veh. Technol.* **2012**, *61*, 4157–4169. <https://doi.org/10.1109/tvt.2012.2215928>.
135. Li, W.; Galluccio, L.; Bassi, F.; Kieffer, M. Distributed Faulty Node Detection in Delay Tolerant Networks: Design and Analysis. *IEEE Trans. Mob. Comput.* **2017**, *17*, 831–844. <https://doi.org/10.1109/tmc.2017.2743703>.
136. Karaliopoulos, M. Engage Others or Leave it to the Source? On Optimal Message Replication in DTNs Under Imperfect Cooperation. *IEEE Trans. Mob. Comput.* **2016**, *16*, 730–743. <https://doi.org/10.1109/tmc.2016.2567388>.

137. Silva, R.F. Adaptive: An Adaptive Routing Protocol for Vehicle Delay-Tolerant Networks. *IEEE Lat. Am. Trans.* **2020**, *18*, 223–231. <https://doi.org/10.1109/tla.2020.9085274>.
138. Shah, V.K.; Luciano, B.; Silvestri, S.; Bhattacharjee, S.; Das, S.K. A Diverse Band-Aware Dynamic Spectrum Access Network Architecture for Delay-Tolerant Smart City Applications. *IEEE Trans. Netw. Serv. Manag.* **2020**, *17*, 1125–1139. <https://doi.org/10.1109/tnsm.2020.2969086>.
139. Yuan, P.; Yang, Z.; Wang, Y.; Gu, S.; Zhang, Q. A Task-Driven Updated Discrete Graph Assisted Minimum Delivery Delay Routing for Remote Sensing Disruption-Tolerant Networks. *IEEE Access* **2019**, *7*, 69351–69362. <https://doi.org/10.1109/access.2019.2918726>.
140. Brugger, M.; Bradford, K.; Ehsan, S.; Hamdaoui, B.; Kovchegov, Y. Analytic Bounds on Data Loss Rates in Mostly-Covered Mobile DTNs. *IEEE Trans. Wirel. Commun.* **2013**, *12*, 3121–3129. <https://doi.org/10.1109/twc.2013.060313.111597>.
141. Stute, M.; Kohnhauser, F.; Baumgartner, L.; Almon, L.; Hollick, M.; Katzenbeisser, S.; Freisleben, B. RESCUE: A Resilient and Secure Device-to-Device Communication Framework for Emergencies. *IEEE Trans. Dependable Secur. Comput.* **2020**, *19*, 1722–1734. <https://doi.org/10.1109/tdsc.2020.3036224>.
142. Silva, R.A.; Netto, J.E.; Paiva, M.A.C.; Anzaloni, A. SynFlight: A Disruption-Aware Programmed Transmission Approach for Air-Ground Networks. *IEEE Lat. Am. Trans.* **2014**, *12*, 1417–1425. <https://doi.org/10.1109/tla.2014.7014509>.
143. Birrane, E.J.; Heiner, S.; McKeever, K. DTN Security Stressors and Strategies. In *Securing Delay-Tolerant Networks with BPsec*; Wiley: Hoboken, NJ, USA, 2023; pp. 31–50. <https://doi.org/10.1002/9781119823513.ch3>.
144. Birrane, E.J.; Heiner, S.; McKeever, K. Introduction. In *Securing Delay-Tolerant Networks with BPsec*; Wiley: Hoboken, NJ, USA, 2023; Volume 1, p. 11. <https://doi.org/10.1002/9781119823513.ch1>.
145. Misra, S.; Goswami, S. Reliability and fault-tolerant and delay-tolerant routing. In *Network Routing: Fundamentals, Applications, and Emerging Technologies*; Wiley: Hoboken, NJ, USA, 2014; pp. 377–410. <https://doi.org/10.1002/9781119114864.ch14>.
146. Datta, S.; Madria, S.K. Prioritized Content Determination and Dissemination Using Reinforcement Learning in DTNs. *IEEE Trans. Netw. Sci. Eng.* **2021**, *9*, 20–32. <https://doi.org/10.1109/tNSE.2021.3072911>.
147. Yuan, Q.; Cardei, I.; Wu, J. An Efficient Prediction-Based Routing in Disruption-Tolerant Networks. *IEEE Trans. Parallel Distrib. Syst.* **2011**, *23*, 19–31. <https://doi.org/10.1109/tpds.2011.140>.
148. Krifa, A.; Barakat, C.; Spyropoulos, T. Message Drop and Scheduling in DTNs: Theory and Practice. *IEEE Trans. Mob. Comput.* **2011**, *11*, 1470–1483. <https://doi.org/10.1109/tmc.2011.163>.
149. Yin, L.; Huimei, L.; Cao, Y. Similarity Degree-based Mobile Pattern Aware Routing in DTNs\*. *Chin. J. Electron. CIE* **2010**, *19*, 23–28. <https://doi.org/10.23919/CJE.2010.10159201>.
150. Rhee, I.; Shin, M.; Hong, S.; Lee, K.; Kim, S.J.; Chong, S. On the Levy-Walk Nature of Human Mobility. *IEEE/ACM Trans. Netw.* **2011**, *19*, 630–643. <https://doi.org/10.1109/tnet.2011.2120618>.
151. Jones, E.P.; Li, L.; Schmidtke, J.K.; Ward, P.A. Practical Routing in Delay-Tolerant Networks. *IEEE Trans. Mob. Comput.* **2007**, *6*, 943–959. <https://doi.org/10.1109/tmc.2007.1016>.
152. Chen, I.-R.; Bao, F.; Chang, M.; Cho, J.-H. Dynamic Trust Management for Delay Tolerant Networks and Its Application to Secure Routing. *IEEE Trans. Parallel Distrib. Syst.* **2013**, *25*, 1200–1210. <https://doi.org/10.1109/tpds.2013.116>.
153. Zhuo, X.; Gao, W.; Cao, G.; Hua, S. An Incentive Framework for Cellular Traffic Offloading. *IEEE Trans. Mob. Comput.* **2013**, *13*, 541–555. <https://doi.org/10.1109/tmc.2013.15>.
154. Gao, W.; Cao, G.; La Porta, T.; Han, J. On Exploiting Transient Social Contact Patterns for Data Forwarding in Delay-Tolerant Networks. *IEEE Trans. Mob. Comput.* **2011**, *12*, 151–165. <https://doi.org/10.1109/tmc.2011.249>.
155. Li, Y.; Su, G.; Wu, D.O.; Jin, D.; Su, L.; Zeng, L. The Impact of Node Selfishness on Multicasting in Delay Tolerant Networks. *IEEE Trans. Veh. Technol.* **2011**, *60*, 2224–2238. <https://doi.org/10.1109/tvt.2011.2149552>.
156. Li, T.; Zhou, H.; Luo, H.; Yu, S. SERvICE: A Software Defined Framework for Integrated Space-Terrestrial Satellite Communication. *IEEE Trans. Mob. Comput.* **2018**, *17*, 703–716. <https://doi.org/10.1109/TMC.2017.2732343>.
157. Banerjee, N.; Corner, M.D.; Levine, B.N. Design and Field Experimentation of an Energy-Efficient Architecture for DTN Throwboxes. *IEEE/ACM Trans. Netw.* **2010**, *18*, 554–567. <https://doi.org/10.1109/tnet.2009.2039491>.
158. Cao, Y.; Jiang, T.; Kaiwartya, O.; Sun, H.; Zhou, H.; Wang, R. Toward Pre-Empted EV Charging Recommendation Through V2V-Based Reservation System. *IEEE Trans. Syst. Man, Cybern. Syst.* **2021**, *51*, 3026–3039. <https://doi.org/10.1109/TSMC.2019.2917149>.
159. Uddin, Y.S.; Ahmadi, H.; Abdelzaher, T.; Kravets, R. Intercontact Routing for Energy Constrained Disaster Response Networks. *IEEE Trans. Mob. Comput.* **2012**, *12*, 1986–1998. <https://doi.org/10.1109/tmc.2012.172>.



160. Wang, Y.; Wu, J.; Yang, W.-S. Cloud-Based Multicasting with Feedback in Mobile Social Networks. *IEEE Trans. Wirel. Commun.* **2013**, *12*, 6043–6053. <https://doi.org/10.1109/twc.2013.102313.121508>.
161. Tournoux, P.-U.; Leguay, J.; Benbadis, F.; Whitbeck, J.; Conan, V.; de Amorim, M.D. Density-Aware Routing in Highly Dynamic DTNs: The RollerNet Case. *IEEE Trans. Mob. Comput.* **2010**, *10*, 1755–1768. <https://doi.org/10.1109/tmc.2010.247>.
162. Seregina, T.; Brun, O.; El-Azouzi, R.; Prabhu, B.J. On the Design of a Reward-Based Incentive Mechanism for Delay Tolerant Networks. *IEEE Trans. Mob. Comput.* **2016**, *16*, 453–465. <https://doi.org/10.1109/tmc.2016.2546910>.
163. Hur, J.; Kang, K. Secure Data Retrieval for Decentralized Disruption-Tolerant Military Networks. *IEEE/ACM Trans. Netw.* **2012**, *22*, 16–26. <https://doi.org/10.1109/tnet.2012.2210729>.
164. Liu, C.; Wu, J. Scalable Routing in Cyclic Mobile Networks. *IEEE Trans. Parallel Distrib. Syst.* **2008**, *20*, 1325–1338. <https://doi.org/10.1109/tpds.2008.218>.
165. Fraire, J.A.; Madoery, P.G.; Finochietto, J.M. On the Design and Analysis of Fair Contact Plans in Predictable Delay-Tolerant Networks. *IEEE Sens. J.* **2014**, *14*, 3874–3882. <https://doi.org/10.1109/jsen.2014.2348917>.
166. Xiao, M.; Wu, J.; Huang, L. Home-Based Zero-Knowledge Multi-Copy Routing in Mobile Social Networks. *IEEE Trans. Parallel Distrib. Syst.* **2014**, *26*, 1238–1250. <https://doi.org/10.1109/tpds.2014.2319211>.
167. Wang, Y.; Yang, W.-S.; Wu, J. Analysis of a Hypercube-Based Social Feature Multipath Routing in Delay Tolerant Networks. *IEEE Trans. Parallel Distrib. Syst.* **2012**, *24*, 1706–1716. <https://doi.org/10.1109/tpds.2012.281>.
168. Niyato, D.; Wang, P.; Tan, H.-P.; Saad, W.; Kim, D.I. Cooperation in Delay-Tolerant Networks with Wireless Energy Transfer: Performance Analysis and Optimization. *IEEE Trans. Veh. Technol.* **2014**, *64*, 3740–3754. <https://doi.org/10.1109/tvt.2014.2357833>.
169. Chen, K.; Shen, H.; Yan, L. Multicent: A Multifunctional Incentive Scheme Adaptive to Diverse Performance Objectives for DTN Routing. *IEEE Trans. Parallel Distrib. Syst.* **2014**, *26*, 1643–1653. <https://doi.org/10.1109/tpds.2014.2323057>.
170. Galluccio, L.; Lorenzo, B.; Glisic, S. Sociality-Aided New Adaptive Infection Recovery Schemes for Multicast DTNs. *IEEE Trans. Veh. Technol.* **2015**, *65*, 3360–3376. <https://doi.org/10.1109/tvt.2015.2450202>.
171. Zhang, T.; Li, H.; Li, J.; Zhang, S.; Shen, H. A Dynamic Combined Flow Algorithm for the Two-Commodity Max-Flow Problem Over Delay-Tolerant Networks. *IEEE Trans. Wirel. Commun.* **2018**, *17*, 7879–7893. <https://doi.org/10.1109/twc.2018.2872551>.
172. Zeng, D.; Guo, S.; Hu, J. Reliable Bulk-Data Dissemination in Delay Tolerant Networks. *IEEE Trans. Parallel Distrib. Syst.* **2013**, *25*, 2180–2189. <https://doi.org/10.1109/tpds.2013.221>.
173. Basu, S.; Roy, S.; DasBit, S. A Post-Disaster Demand Forecasting System Using Principal Component Regression Analysis and Case-Based Reasoning Over Smartphone-Based DTN. *IEEE Trans. Eng. Manag.* **2018**, *66*, 224–239. <https://doi.org/10.1109/tem.2018.2794146>.
174. Liang, H.; Gao, W.; Nguyen, J.H.; Orpilla, M.F.; Yu, W. Internet of Things Data Collection Using Unmanned Aerial Vehicles in Infrastructure Free Environments. *IEEE Access* **2019**, *8*, 3932–3944. <https://doi.org/10.1109/access.2019.2962323>.
175. Chen, K.; Shen, H. SMART: Utilizing Distributed Social Map for Lightweight Routing in Delay-Tolerant Networks. *IEEE/ACM Trans. Netw.* **2013**, *22*, 1545–1558. <https://doi.org/10.1109/tnet.2013.2281583>.
176. Medjiah, S.; Taleb, T.; Ahmed, T. Sailing over Data Mules in Delay-Tolerant Networks. *IEEE Trans. Wirel. Commun.* **2014**, *13*, 5–13. <https://doi.org/10.1109/tw.2013.123013.120398>.
177. Wei, K.; Guo, S.; Zeng, D.; Xu, K.; Li, K. Exploiting Small World Properties for Message Forwarding in Delay Tolerant Networks. *IEEE Trans. Comput.* **2015**, *64*, 2809–2818. <https://doi.org/10.1109/tc.2015.2389807>.
178. Cao, Y.; Wei, K.; Min, G.; Weng, J.; Yang, X.; Sun, Z. A Geographic Multicopy Routing Scheme for DTNs With Heterogeneous Mobility. *IEEE Syst. J.* **2018**, *12*, 790–801. <https://doi.org/10.1109/JSYST.2016.2563519>.
179. Takahashi, A.; Nishiyama, H.; Kato, N.; Nakahira, K.; Sugiyama, T. Replication Control for Ensuring Reliability of Convergecast Message Delivery in Infrastructure-Aided DTNs. *IEEE Trans. Veh. Technol.* **2014**, *63*, 3223–3231. <https://doi.org/10.1109/tvt.2014.2299288>.
180. Zhang, S.; Wu, J.; Lu, S. Distributed Workload Dissemination for Makespan Minimization in Disruption Tolerant Networks. *IEEE Trans. Mob. Comput.* **2015**, *15*, 1661–1673. <https://doi.org/10.1109/tmc.2015.2480075>.
181. Yang, S.; Yeo, C.K.; Lee, F.B.S. Cooperative Duty Cycling for Energy-Efficient Contact Discovery in Pocket Switched Networks. *IEEE Trans. Veh. Technol.* **2012**, *62*, 1815–1826. <https://doi.org/10.1109/tvt.2012.2227865>.
182. Yang, T.; Kong, L.; Zhao, N.; Sun, R. Efficient Energy and Delay Tradeoff for Vessel Communications in SDN Based Maritime Wireless Networks. *IEEE Trans. Intell. Transp. Syst.* **2021**, *22*, 3800–3812. <https://doi.org/10.1109/tits.2021.3058140>.

183. Zhao, J.; Zhuo, X.; Li, Q.; Gao, W.; Cao, G. Contact Duration Aware Data Replication in DTNs with Licensed and Unlicensed Spectrum. *IEEE Trans. Mob. Comput.* **2015**, *15*, 803–816. <https://doi.org/10.1109/tmc.2015.2439271>.
184. Basilico, N.; Cesana, M.; Gatti, N. Algorithms to Find Two-Hop Routing Policies in Multiclass Delay Tolerant Networks. *IEEE Trans. Wirel. Commun.* **2016**, *15*, 4017–4031. <https://doi.org/10.1109/twc.2016.2532859>.
185. Rashidi, L.; Entezari-Maleki, R.; Chatzopoulos, D.; Hui, P.; Trivedi, K.S.; Movaghar, A. Performance Evaluation of Epidemic Content Retrieval in DTNs with Restricted Mobility. *IEEE Trans. Netw. Serv. Manag.* **2019**, *16*, 701–714. <https://doi.org/10.1109/tnsm.2019.2909108>.
186. Wei, K.; Duan, R.; Shi, G.; Xu, K. Distribution of inter-contact time: An analysis-based on social relationships. *J. Commun. Netw.* **2013**, *15*, 504–513. <https://doi.org/10.1109/jcn.2013.000090>.
187. Chen, K.; Shen, H.; Yan, L. DSearching: Using Floating Mobility Information for Distributed Node Searching in DTNs. *IEEE Trans. Mob. Comput.* **2015**, *15*, 121–136. <https://doi.org/10.1109/tmc.2015.2409867>.
188. Jiao, Z.; Tian, R.; Zhang, B.; Li, C. DTN routing with back-pressure based replica distribution. *J. Commun. Netw.* **2014**, *16*, 378–384. <https://doi.org/10.1109/jcn.2014.000067>.
189. Furutani, T.; Kawamoto, Y.; Nishiyama, H.; Kato, N. Proposal and Performance Evaluation of Information Diffusion Technique with Novel Virtual-Cell-Based Wi-Fi Direct. *IEEE Trans. Emerg. Top. Comput.* **2019**, *9*, 1519–1528. <https://doi.org/10.1109/tetc.2019.2891713>.
190. Cavallari, R.; Toumpis, S.; Verdone, R.; Kontoyiannis, I. Packet Speed and Cost in Mobile Wireless Delay-Tolerant Networks. *IEEE Trans. Inf. Theory* **2020**, *66*, 5683–5702. <https://doi.org/10.1109/TIT.2020.3009690>.
191. Altman, E.; De Pellegrini, F.; Miorandi, D.; Neglia, G. Adaptive Optimal Stochastic Control of Delay-Tolerant Networks. *IEEE Trans. Mob. Comput.* **2016**, *16*, 1815–1829. <https://doi.org/10.1109/tmc.2016.2611507>.
192. Wang, R.; Wang, Z.; Ma, W.; Deng, S.; Huang, H. Epidemic Routing Performance in DTN With Selfish Nodes. *IEEE Access* **2019**, *7*, 65560–65568. <https://doi.org/10.1109/access.2019.2916685>.
193. De Souza, C.D.T.; Ferreira, D.L.; Campos, C.A.V.; Junior, A.C.D.O.; Cardoso, K.V.; Moreira, W. Employing Social Cooperation to Improve Data Discovery and Retrieval in Content-Centric Delay-Tolerant Networks. *IEEE Access* **2019**, *7*, 137930–137944. <https://doi.org/10.1109/access.2019.2943080>.
194. Ribeiro, F.J.L.; de Castro Pinto Pedroza, A.; Costa, L.H.M.K. Deepwater Monitoring System in Underwater Delay/Disruption Tolerant Network. *IEEE Lat. Am. Trans.* **2012**, *10*, 1324–1331. <https://doi.org/10.1109/TLA.2012.6142480>.
195. Cao, L.; Viswanathan, R. Average Operation Time of Bundle Protocol in Delay/Disruption-Tolerant Networks. *IEEE Trans. Wirel. Commun.* **2022**, *21*, 5801–5813. <https://doi.org/10.1109/twc.2022.3143533>.
196. Margalho, M.; Efrat, A.; Johnson, T. Improving Robustness in DTN Networks that Carries Large Medical Files in Amazonia. *IEEE Lat. Am. Trans.* **2016**, *14*, 349–355. <https://doi.org/10.1109/tla.2016.7430100>.
197. Birrane, E.J.; Heiner, S.; McKeever, K. Special considerations. In *Securing Delay-Tolerant Networks with BPsec*; Wiley: Hoboken, NJ, USA, 2023; pp. 260–281. <https://doi.org/10.1002/9781119823513.ch14>.
198. Birrane, E.J.; Heiner, S.; McKeever, K. Threat considerations for BPv7 networks. In *Securing Delay-Tolerant Networks with BPsec*; Wiley: Hoboken, NJ, USA, 2023; pp. 159–177. <https://doi.org/10.1002/9781119823513.ch9>.
199. Samdanis, K.; Rost, P.; Maeder, A.; Meo, M.; Verikoukis, C. Towards delay-tolerant cognitive cellular networks. In *Green Communications: Principles, Concepts and Practice*; Wiley: Hoboken, NJ, USA, 2014; pp. 199–216. <https://doi.org/10.1002/9781118759257.ch10>.
200. Glisic, S.G. Large scale networks and mean field theory. In *Advanced Wireless Networks: Technology and Business Models*; Wiley: Hoboken, NJ, USA, 2016; pp. 659–725. <https://doi.org/10.1002/9781119096863.ch20>.
201. Birrane, E.J.; Heiner, S.; McKeever, K. The Design of the bundle protocol security extensions. In *Securing Delay-Tolerant Networks with BPsec*; Wiley: Hoboken, NJ, USA, 2023; pp. 71–92. <https://doi.org/10.1002/9781119823513.ch5>.
202. Karlsson, G.; Almeroth, K.; Fall, K.; May, M.; Yates, R.; Lea, C.-T. Guest editorial—Delay and disruption tolerant wireless communication. *IEEE J. Sel. Areas Commun.* **2008**, *26*, 745–747. <https://doi.org/10.1109/JSAC.2008.080601>.
203. Fusté, O.; Marin-De-Yzaguirre, M.; Ruiz-De-Azua, J. *Implementation of a Protocol Stack with DTN Protocols for IoT Services Deployed from Non-Terrestrial Networks*; International Astronautical Federation: Paris, France, 2023.
204. Marin-De-Yzaguirre, M.; Fusté, O.; Ruiz-De-Azua, J. *Study to Integrate Delay-Tolerant Network Protocols in IoT LEO Constellations for Flood Prevention*; International Astronautical Federation: Paris, France, 2023.
